# Supplementary material for: Evidence for a Spoken Word Lexicon in the Auditory Ventral Stream
Source: PubMed Central journal article supplement (PMC10426387; doi:10.1162/nol_a_00108), 2023-07-20
Supplement: nol-4-3-420-s001.pdf [file nol-4-3-420-s001.pdf]

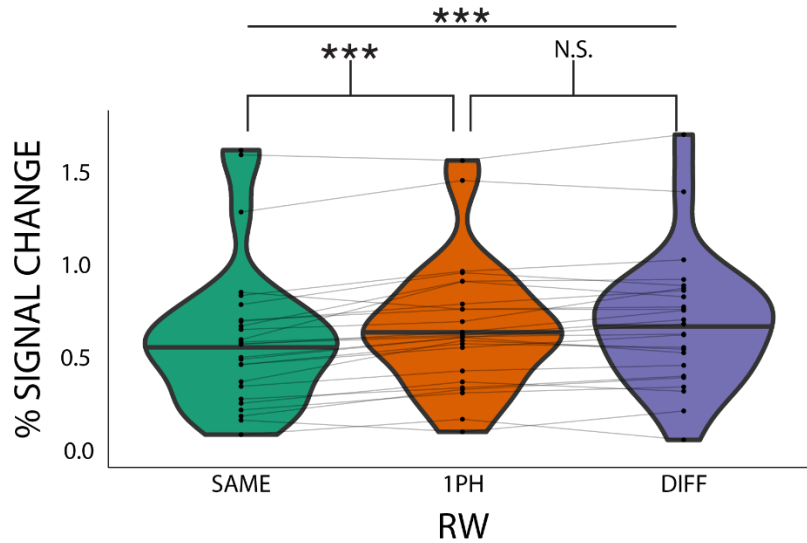

**Figure S1.** Evidence for auditory lexical representations in the auditory word form area.

Adaptation profile for auditory real words (RWs) using the full data set ( $n = 26$ ), including those ( $n = 2$ ) without corresponding untrained pseudoword scans. RWs show tight tuning to individual RWs consistent with an auditory lexicon. Horizontal black line in violin plots indicates the median. \*\*\*, \*\*, \*, and N.S. mark  $p < 0.001$ ,  $< 0.01$ ,  $< 0.05$ , and not significant ( $> 0.1$ ), all Bonferroni-corrected for multiple comparisons.

**Table S1.** Individual subject AWFA ROIs

| Subject    | X-coordinate | Y-coordinate | Z-coordinate |
|------------|--------------|--------------|--------------|
| sub-MR1076 | -62          | -16          | 2            |
| sub-MR1106 | -62          | -16          | 4            |
| sub-MR1215 | -62          | -16          | 4            |
| sub-MR1216 | -62          | -12          | 0            |
| sub-MR1217 | -64          | -20          | 4            |

|            |     |     |    |
|------------|-----|-----|----|
| sub-MR1220 | -58 | -16 | 0  |
| sub-MR1221 | -64 | -14 | 4  |
| sub-MR1222 | -64 | -10 | 0  |
| sub-MR1233 | -62 | -12 | 8  |
| sub-MR1234 | -62 | -12 | 6  |
| sub-MR1240 | -66 | -16 | 6  |
| sub-MR1242 | -62 | -16 | 0  |
| sub-MR1252 | -60 | -10 | 2  |
| sub-MR1253 | -60 | -10 | 0  |
| sub-MR1258 | -58 | -12 | 0  |
| sub-MR1272 | -62 | -18 | 2  |
| sub-MR1273 | -58 | -18 | 6  |
| sub-MR1277 | -64 | -18 | 2  |
| sub-MR1278 | -66 | -22 | 4  |
| sub-MR1282 | -60 | -12 | -2 |
| sub-MR1283 | -62 | -18 | 4  |
| sub-MR1284 | -60 | -16 | 4  |
| sub-MR1286 | -64 | -12 | -2 |
| sub-MR1287 | -60 | -16 | 6  |
| sub-MR1289 | -66 | -20 | 2  |
| sub-MR1294 | -62 | -10 | 2  |

**Table S2.** Significant clusters of connectivity with the AWFA

| X-coordinate | Y-coordinate | Z-coordinate | Size (mm <sup>3</sup> ) | <i>p</i> FDR |
|--------------|--------------|--------------|-------------------------|--------------|
| 64           | -20          | 0            | 5239                    | 0            |
| -64          | -28          | 8            | 5217                    | 0            |
| -6           | 12           | 48           | 970                     | 0            |
| 50           | -2           | 50           | 934                     | 0            |
| -12          | 26           | 58           | 800                     | 0            |
| -46          | 12           | 26           | 799                     | 0            |
| -40          | -76          | 36           | 737                     | 0            |
| -34          | 24           | 8            | 429                     | 0            |
| 18           | -24          | -4           | 351                     | 0            |
| -26          | -62          | -24          | 272                     | 0            |
| 46           | -68          | 28           | 258                     | 0            |
| 12           | -70          | -18          | 256                     | 0            |
| 34           | 30           | 54           | 242                     | 0            |
| -4           | -92          | 4            | 203                     | 0            |
| 40           | -80          | 8            | 134                     | 0            |
| -62          | -24          | -14          | 100                     | 0            |
| -44          | -46          | -14          | 100                     | 0            |
| 8            | -60          | 68           | 67                      | 0.000007     |

|     |     |     |    |          |
|-----|-----|-----|----|----------|
| 14  | -92 | 0   | 63 | 0.000012 |
| 38  | -52 | 48  | 60 | 0.000018 |
| -30 | -52 | 40  | 57 | 0.000026 |
| 6   | 54  | 16  | 52 | 0.000055 |
| -10 | -52 | 28  | 48 | 0.000101 |
| -12 | -66 | 8   | 45 | 0.00016  |
| -6  | -32 | 28  | 43 | 0.000206 |
| 8   | 8   | 6   | 43 | 0.000206 |
| 20  | 8   | 0   | 41 | 0.00028  |
| 24  | -52 | 6   | 39 | 0.000383 |
| -30 | -2  | 56  | 38 | 0.000426 |
| 46  | -58 | -26 | 38 | 0.000426 |
| 26  | -38 | -16 | 32 | 0.001193 |
| -6  | -18 | 8   | 32 | 0.001193 |
| -24 | -40 | -8  | 27 | 0.003037 |
| -44 | 4   | -36 | 23 | 0.006664 |
| -10 | -66 | -16 | 22 | 0.007996 |
| 56  | -24 | 32  | 21 | 0.009372 |
| 50  | -30 | 56  | 21 | 0.009372 |
| -8  | 58  | 12  | 18 | 0.017283 |
| -6  | 50  | 10  | 18 | 0.017283 |
| 34  | -52 | -14 | 17 | 0.02019  |
| -32 | 16  | -16 | 17 | 0.02019  |

|     |     |     |    |          |
|-----|-----|-----|----|----------|
| 8   | -28 | 30  | 17 | 0.02019  |
| -2  | -4  | 20  | 16 | 0.023298 |
| -40 | -48 | 42  | 16 | 0.023298 |
| 6   | -14 | 30  | 16 | 0.023298 |
| 8   | -34 | -28 | 16 | 0.023298 |
| -48 | -36 | 50  | 15 | 0.02896  |
| -32 | -36 | -18 | 14 | 0.034761 |
| 18  | -82 | 12  | 14 | 0.034761 |
| -6  | -70 | -26 | 14 | 0.034761 |
